# Supplementary material
Source: HighWire-hosted journal article supplement (http://www.cmajopen.ca/highwire/filestream/80748/field_highwire_adjunct_files/1/open-2013-0016-2-at.pdf)

Appendix 2 (as supplied by the authors) : Provincial predictions of future prevalence of adult obesity, from 2013 to 2019, by weight category

Figure A Newfoundland and Labrador: BMI Prevalence Predictions 2013-2019

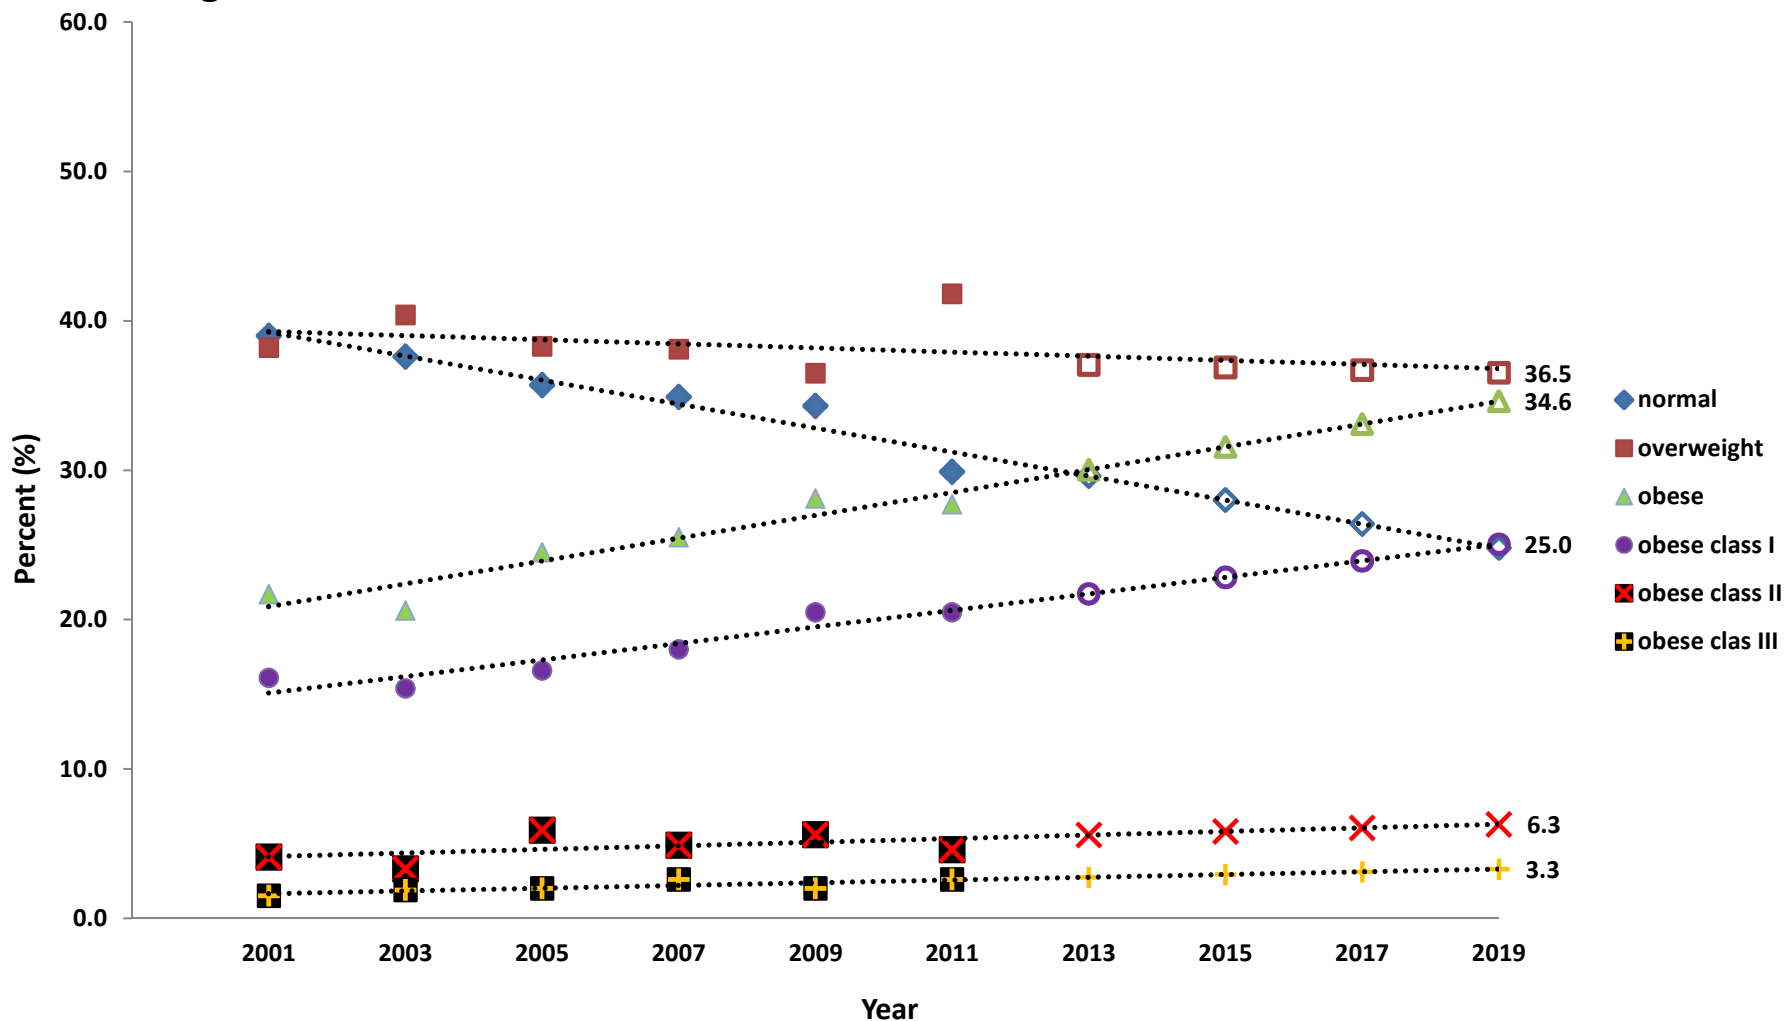

Appendix to: Twells LK, Gregory DM, Reddigan J, et al. Current and predicted prevalence of obesity in Canada: a trend analysis. *CMAJ Open* 2014. DOI: 10.1503/cmajo.20130016.

Copyright © 2014 The Author(s) or their employer(s).

To receive this resource in an accessible format, please contact us at [cmajgroup@cmaj.ca](mailto:cmajgroup@cmaj.ca).

Figure B Prince Edward Island: BMI Prevalence Predictions 2013-2019

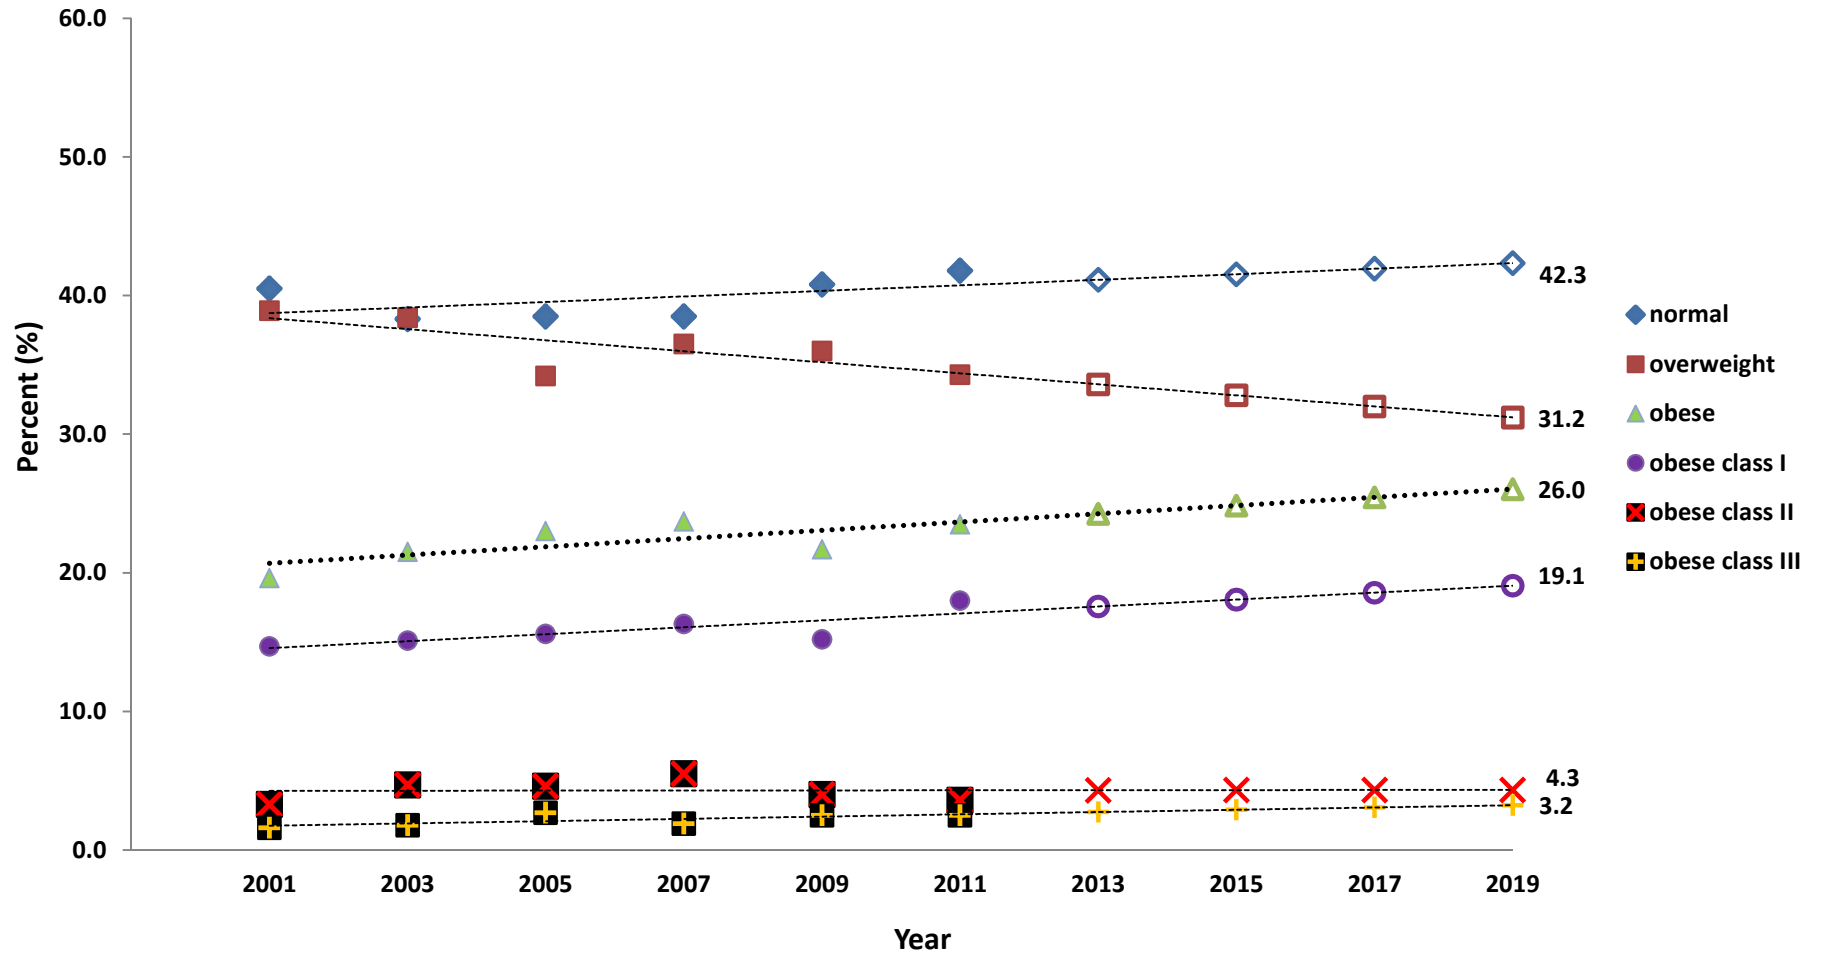

Figure C Nova Scotia: BMI Prevalence Predictions 2013-2019

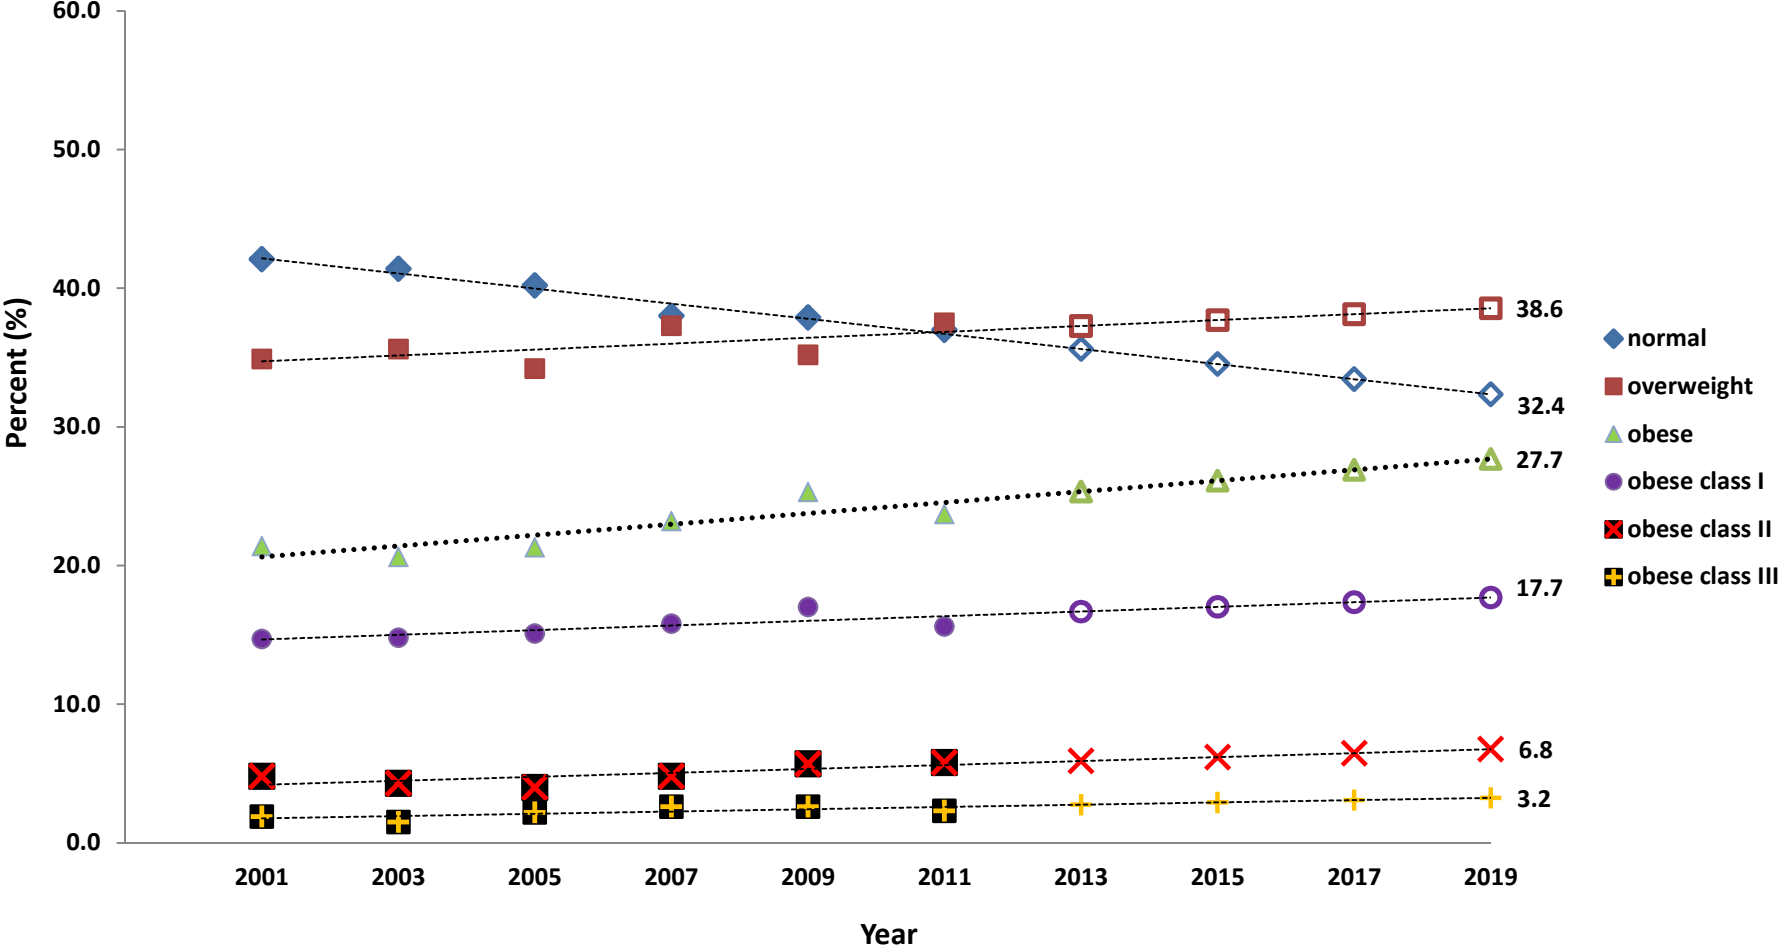

Figure D New Brunswick: BMI Prevalence Predictions 2013-2019

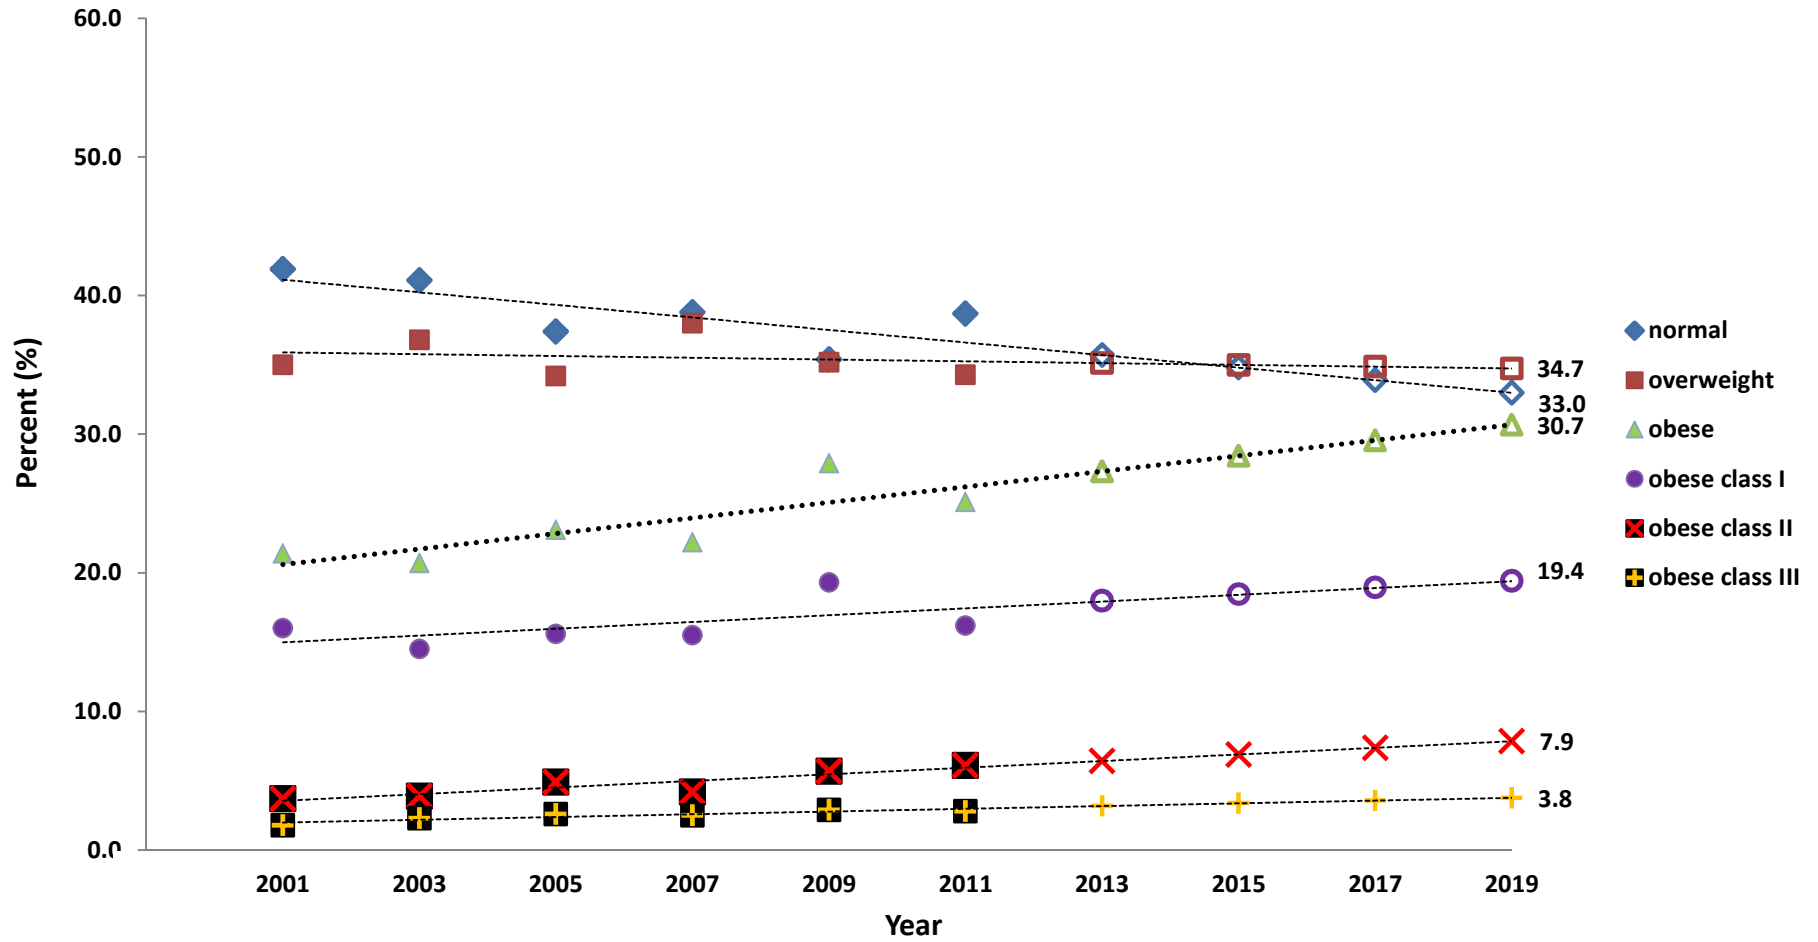

Figure E Quebec: BMI Prevalence Predictions 2013-2019

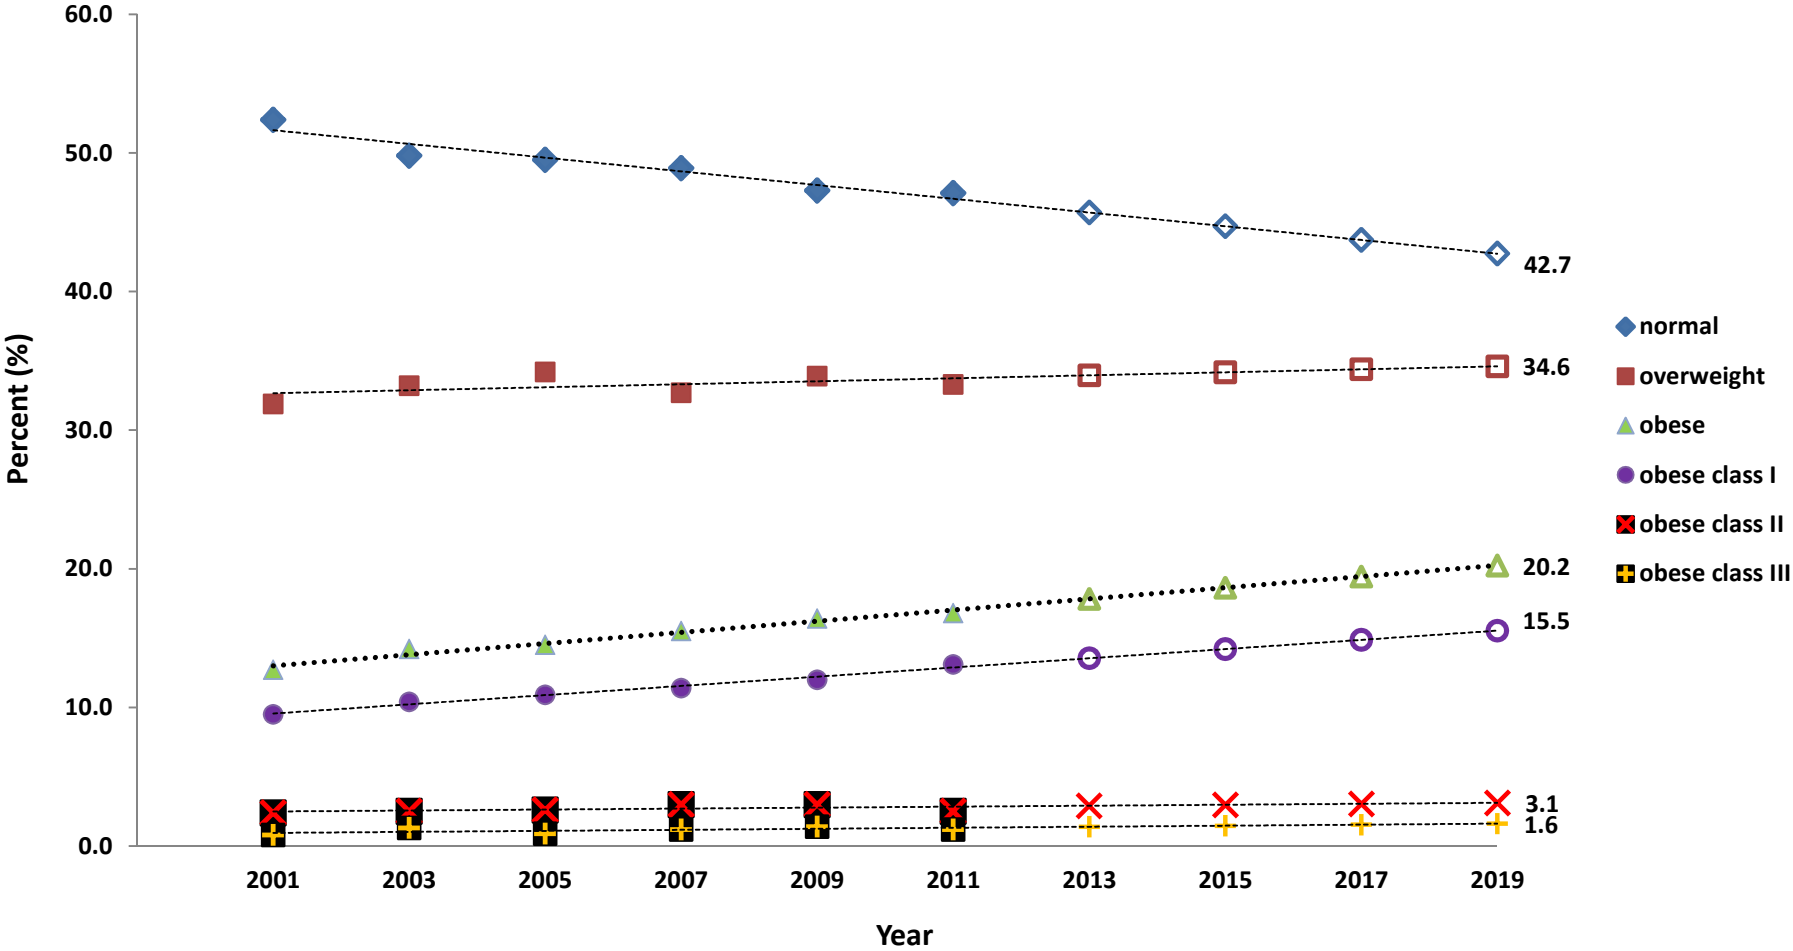

Figure F Ontario: BMI Prevalence Predictions 2013-2019

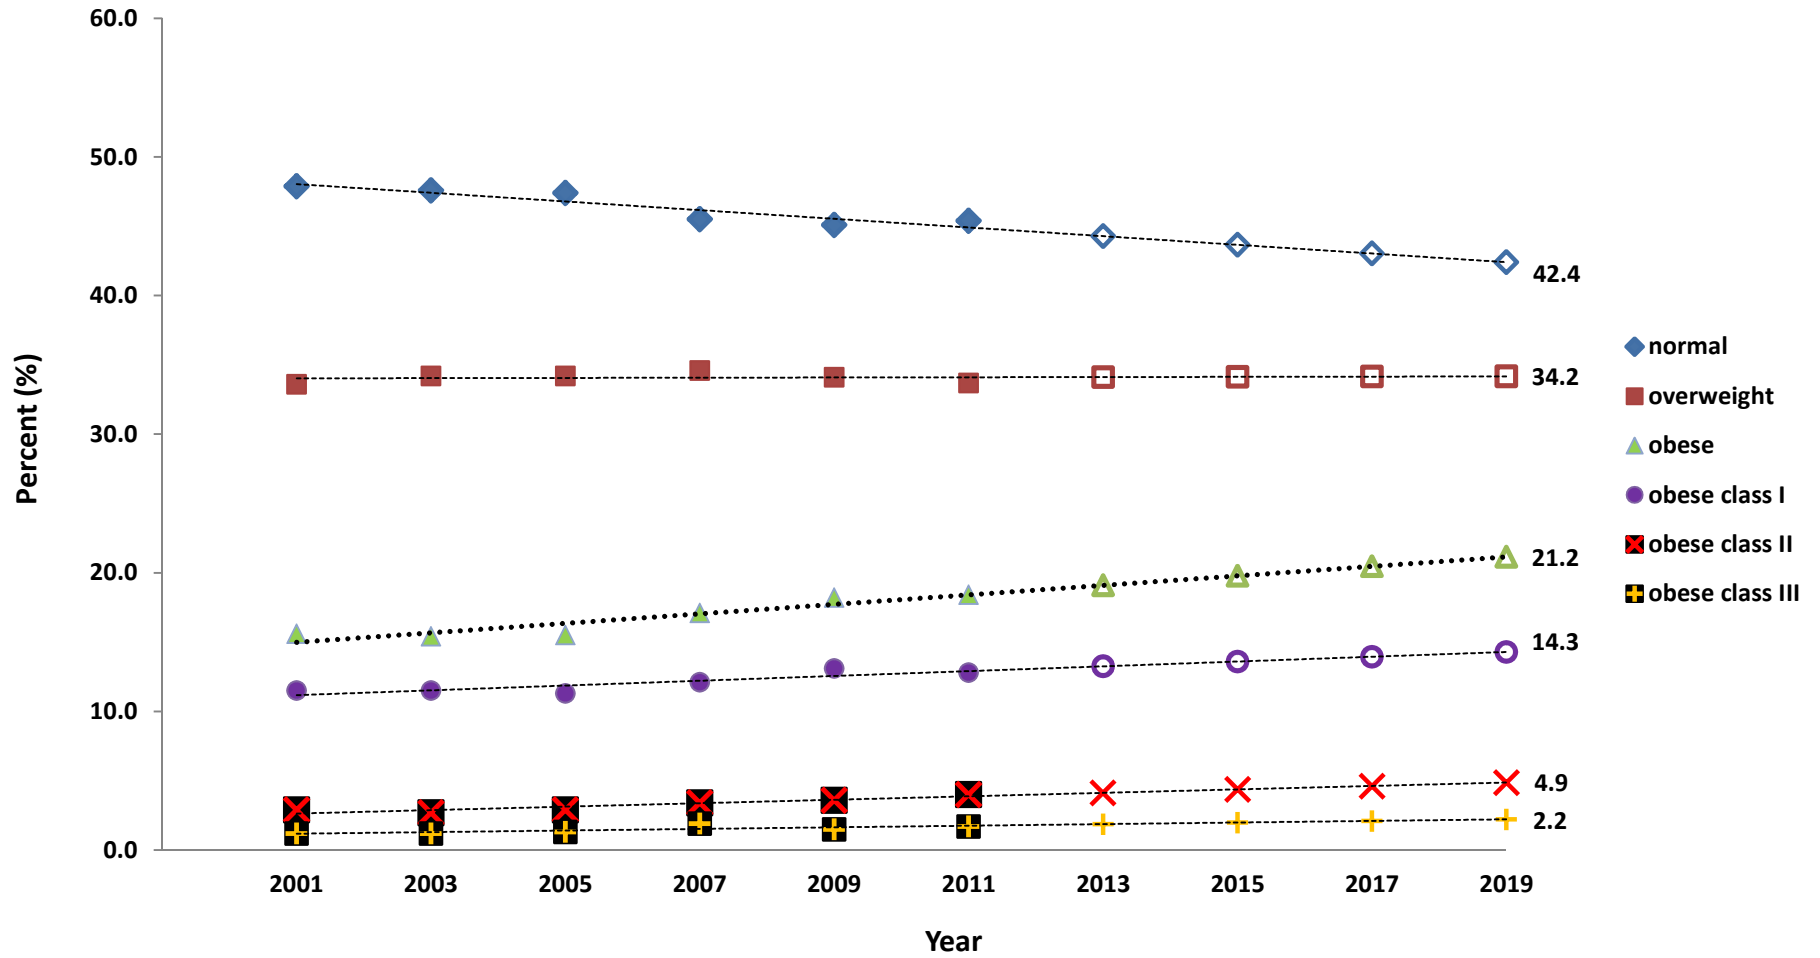

Figure G Saskatchewan: BMI Prevalence Predictions 2013-2019

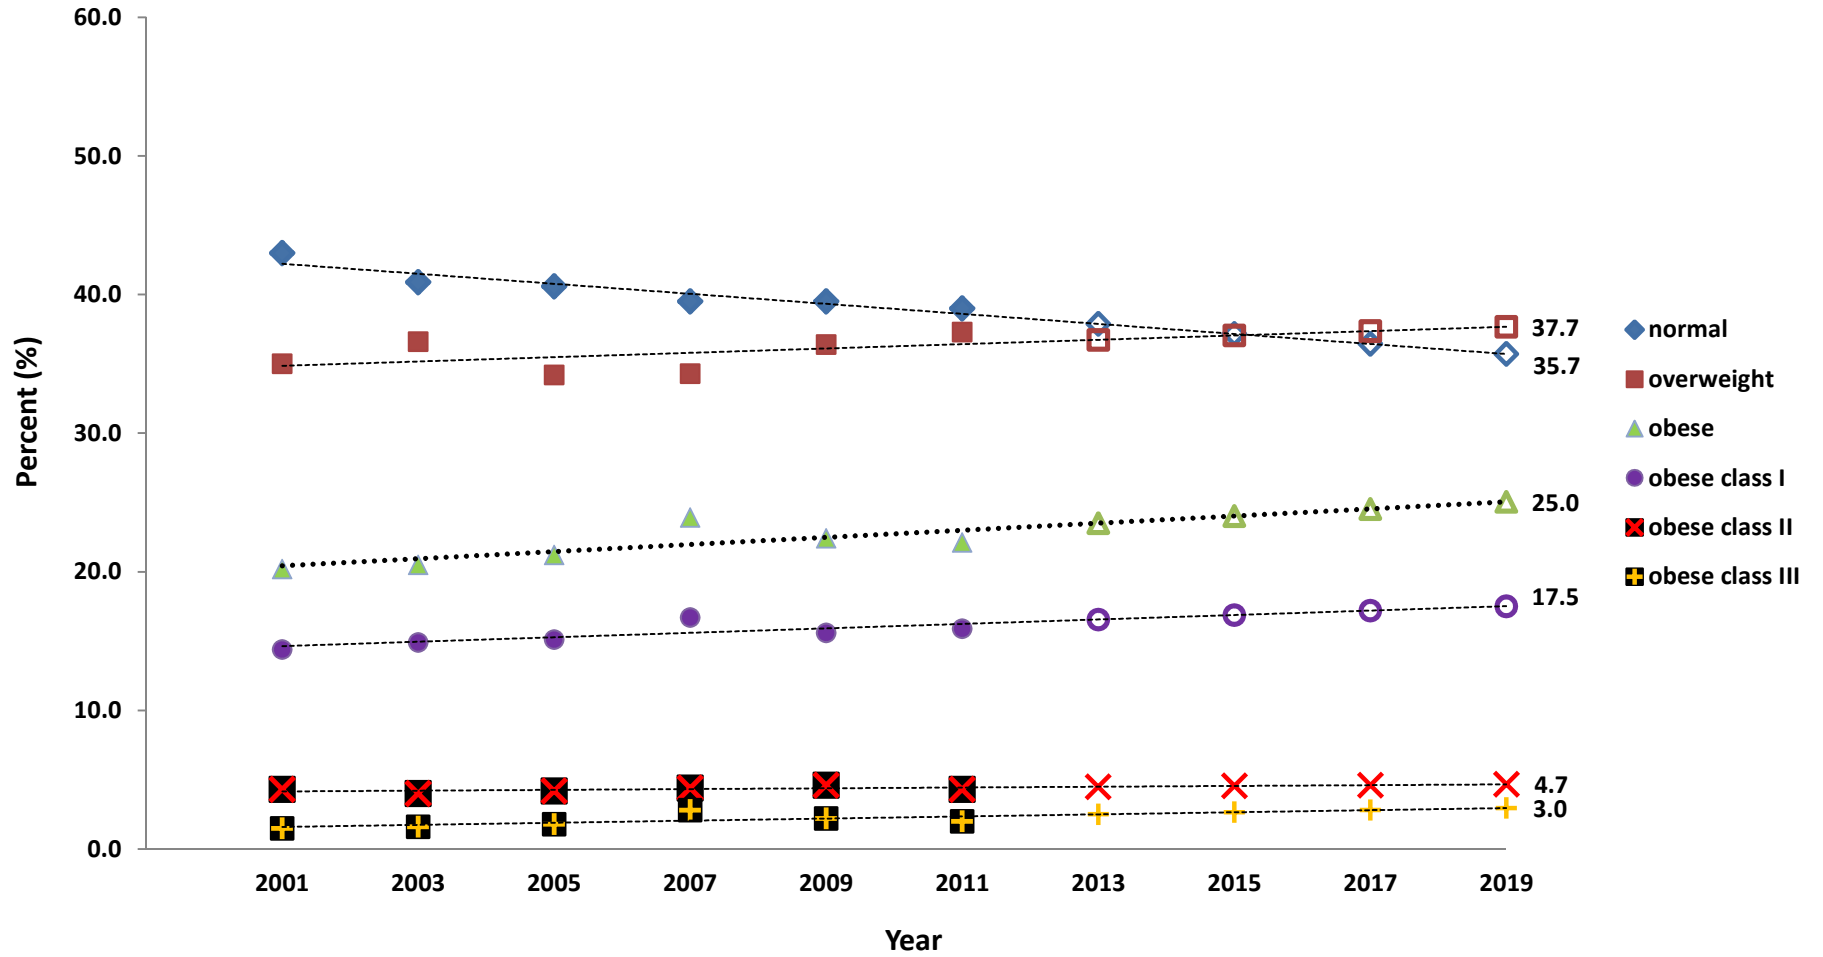

Figure H Manitoba: BMI Prevalence Predictions 2013-2019

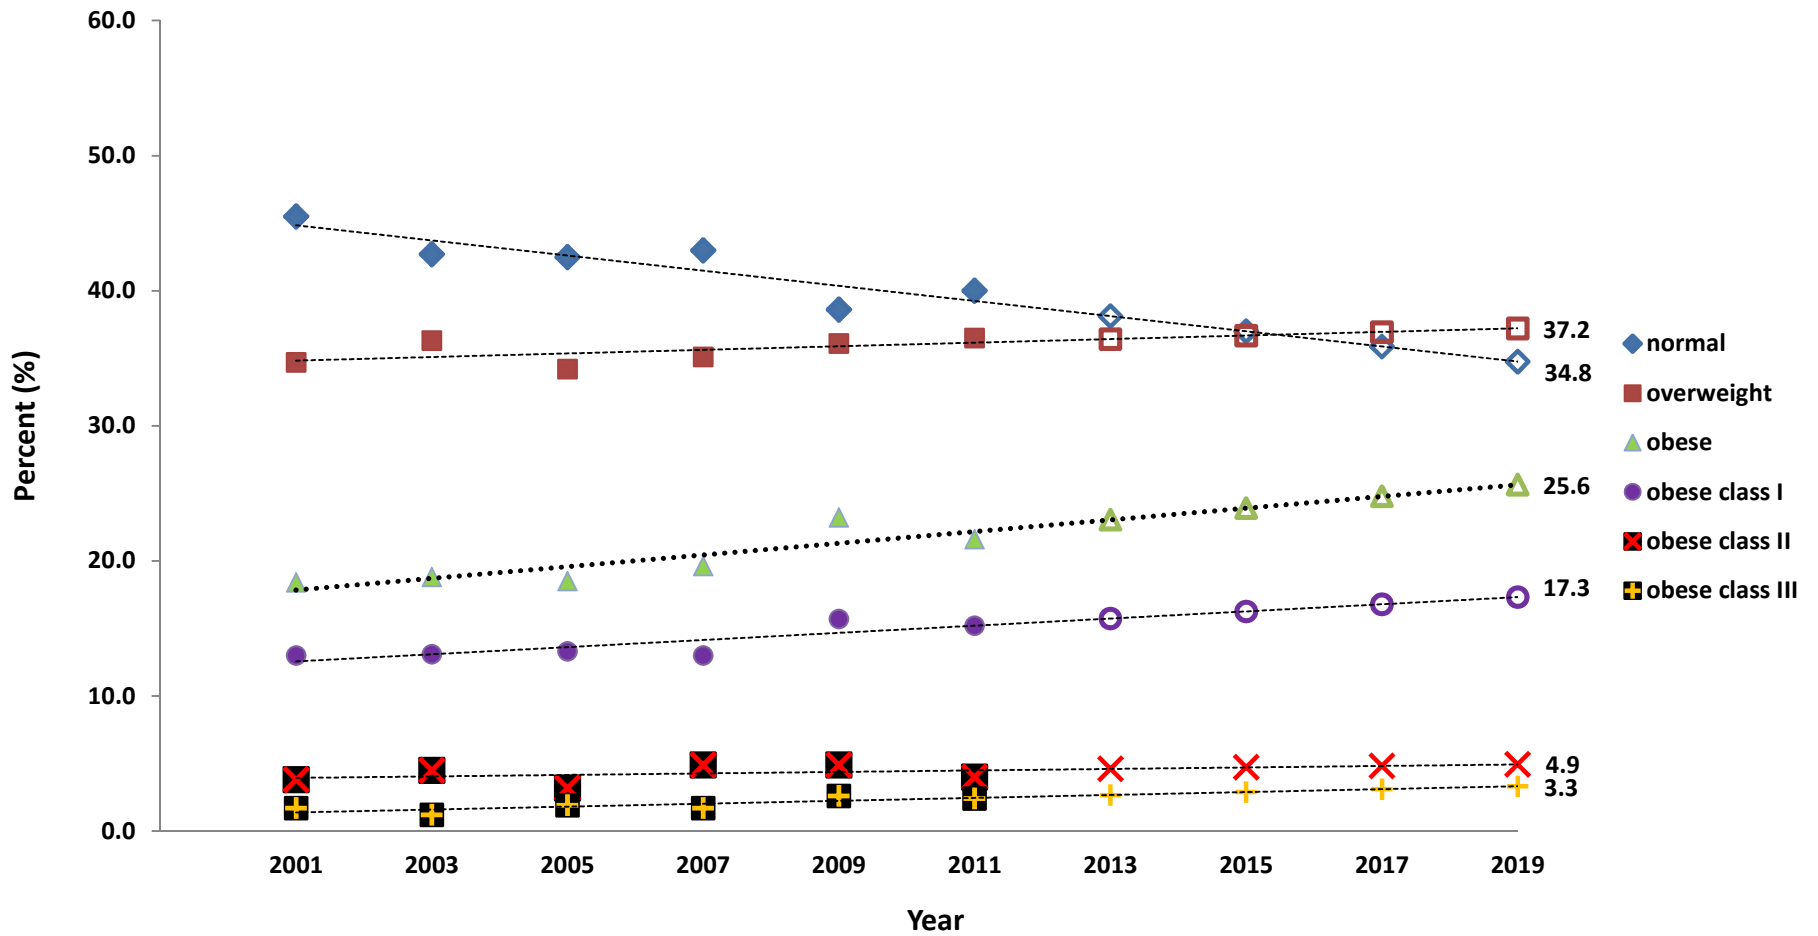



Figure I Alberta: BMI Prevalence Predictions 2013-2019

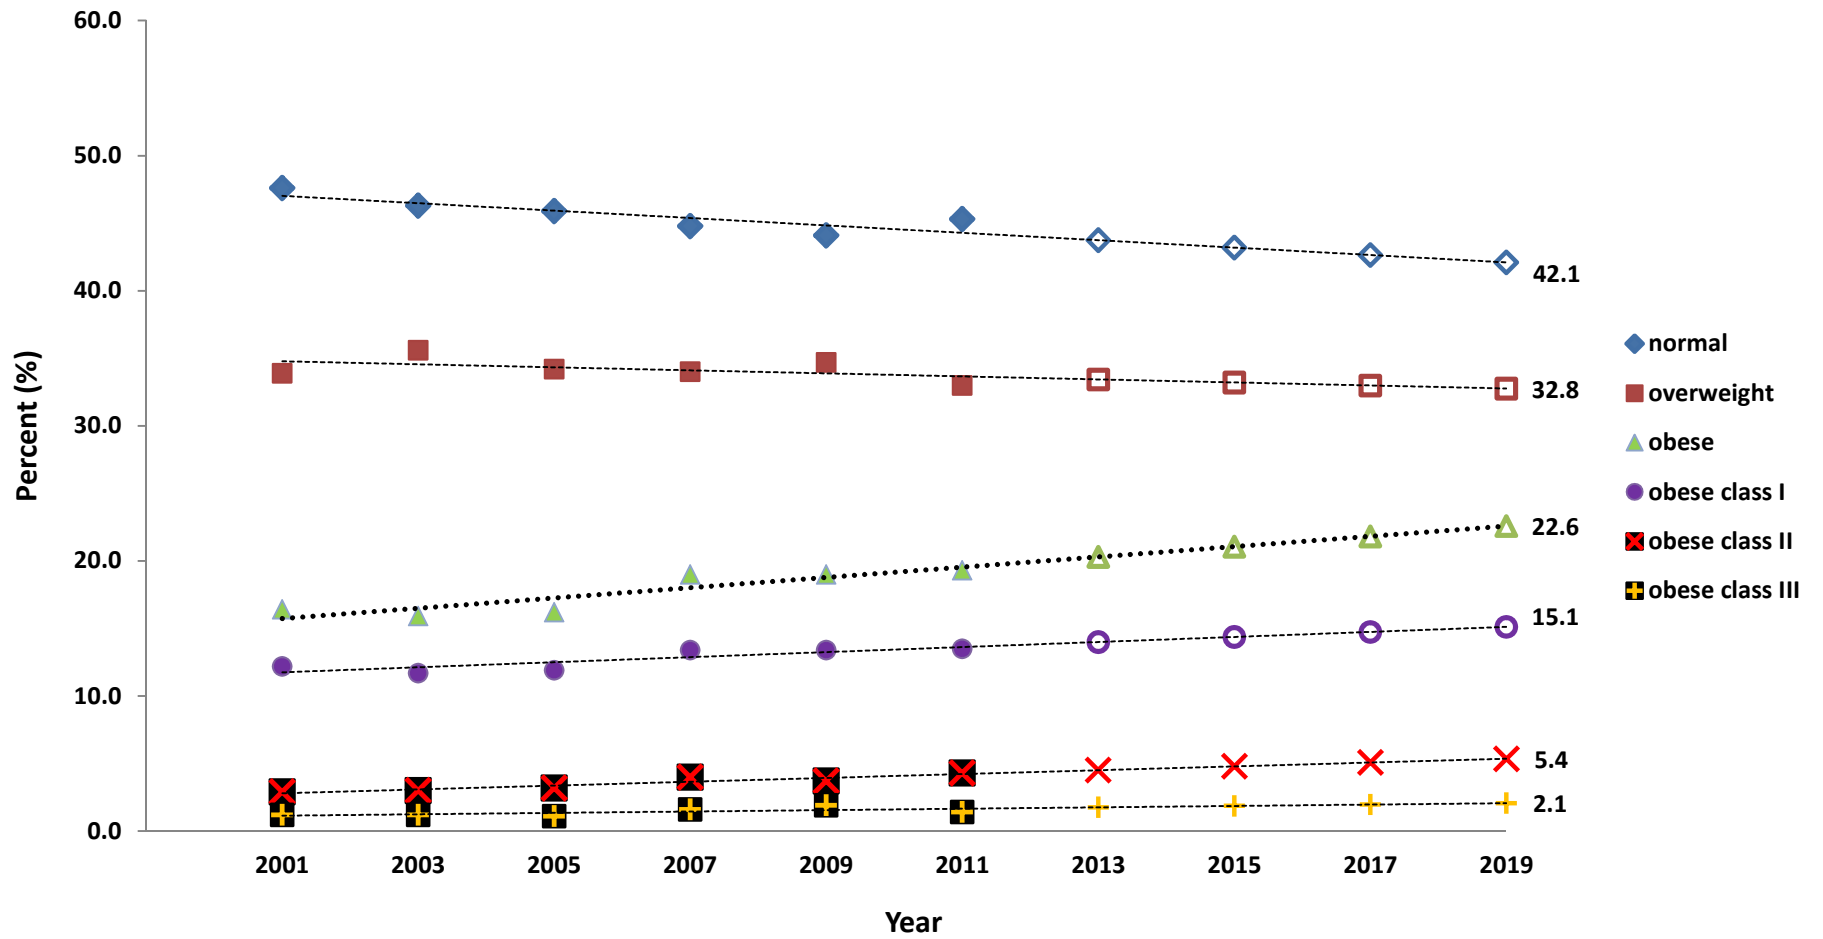

Figure J British Columbia: BMI Prevalence Predictions 2013-2019

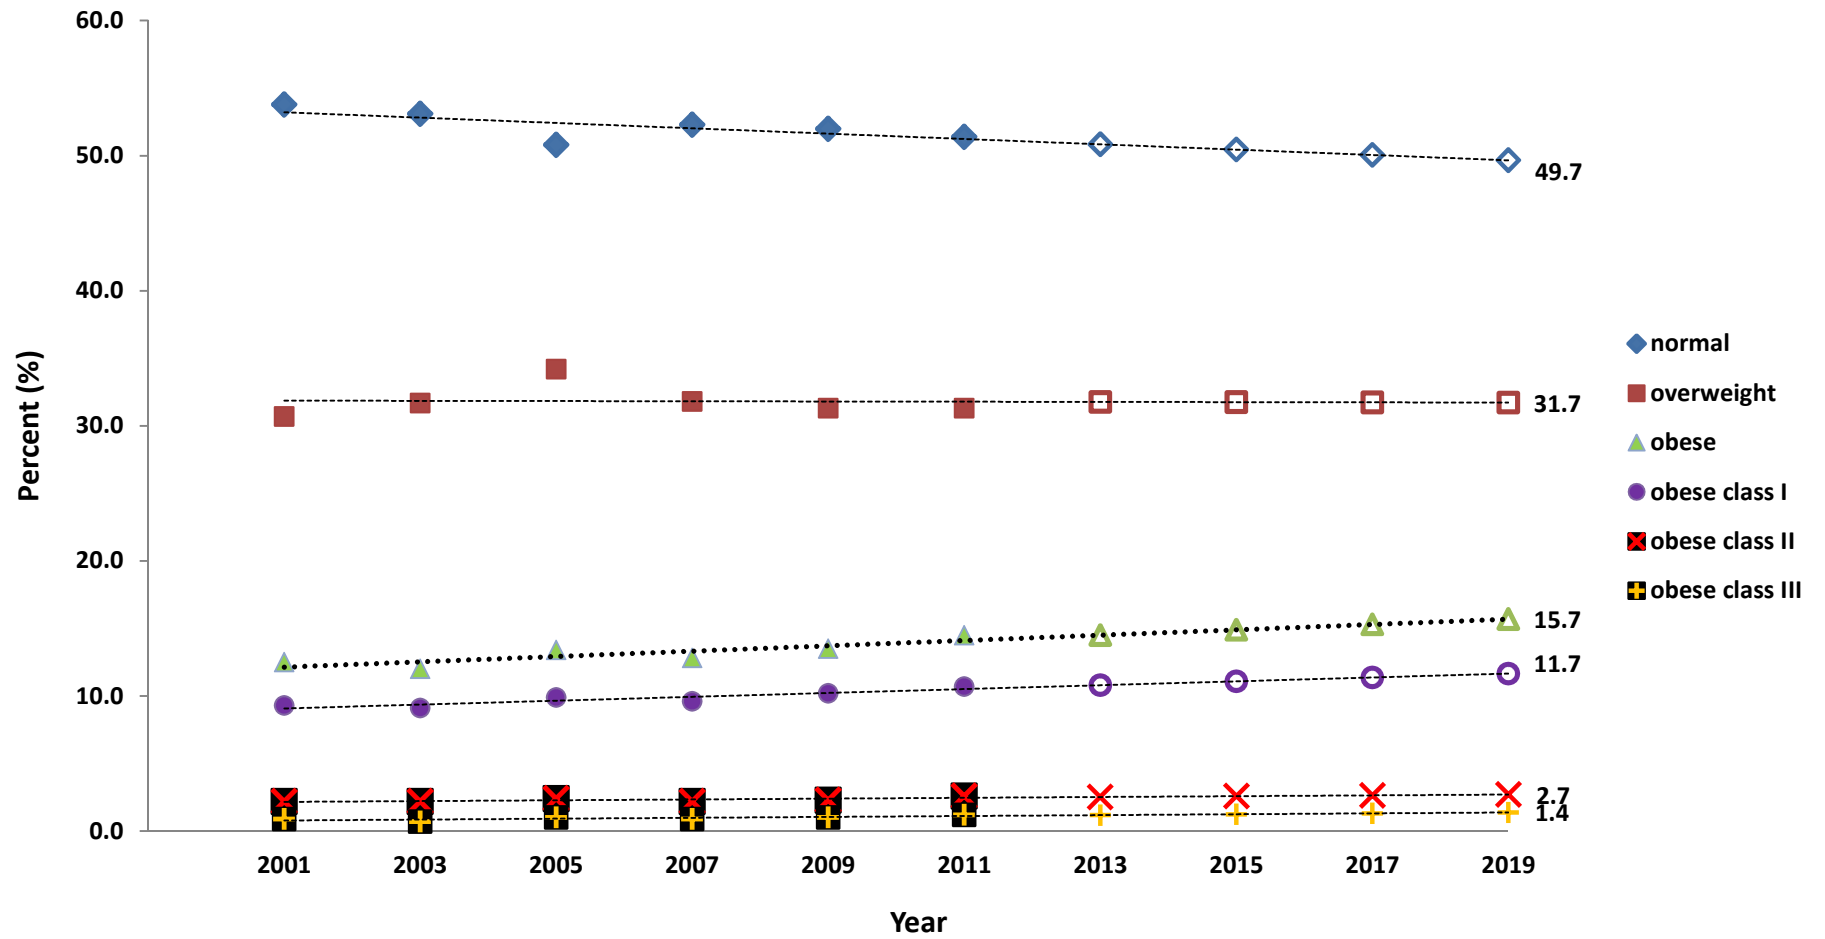

Supplement: open-2013-0016-2-at.pdf [file open-2013-0016-2-at.pdf]
